# Supplementary material for: Cell Cycle Status Influences Resistance to Apoptosis Induced by Oxidative Stress in Human Breast Cancer Cells, Which Is Accompanied by Modulation of Autophagy
Source: MDPI journal article supplement (doi:10.3390/cimb45080399), 2023-07-29
Supplement: s1 [file s1]

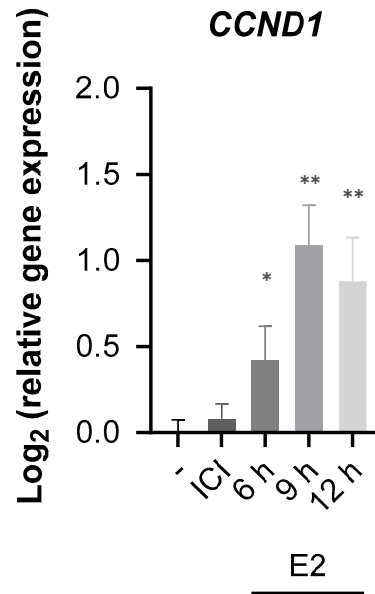

**Figure S1.** Effect of cell cycle modulation in MCF-7 cells. Gene expression in MCF-7 cells arrested in G0-like phase by ICI 182780/fulvestrant (ICI; 10 nM) and cells which reinitiated cell cycle by 17 $\beta$ -estradiol (E2; 100 nM). Gene expression was analysed with real-time qPCR and normalised to GAPDH (n = 9). Results are presented as median  $\pm$  CI, \*\* –  $p < 0.01$ , \* –  $p < 0.05$ .

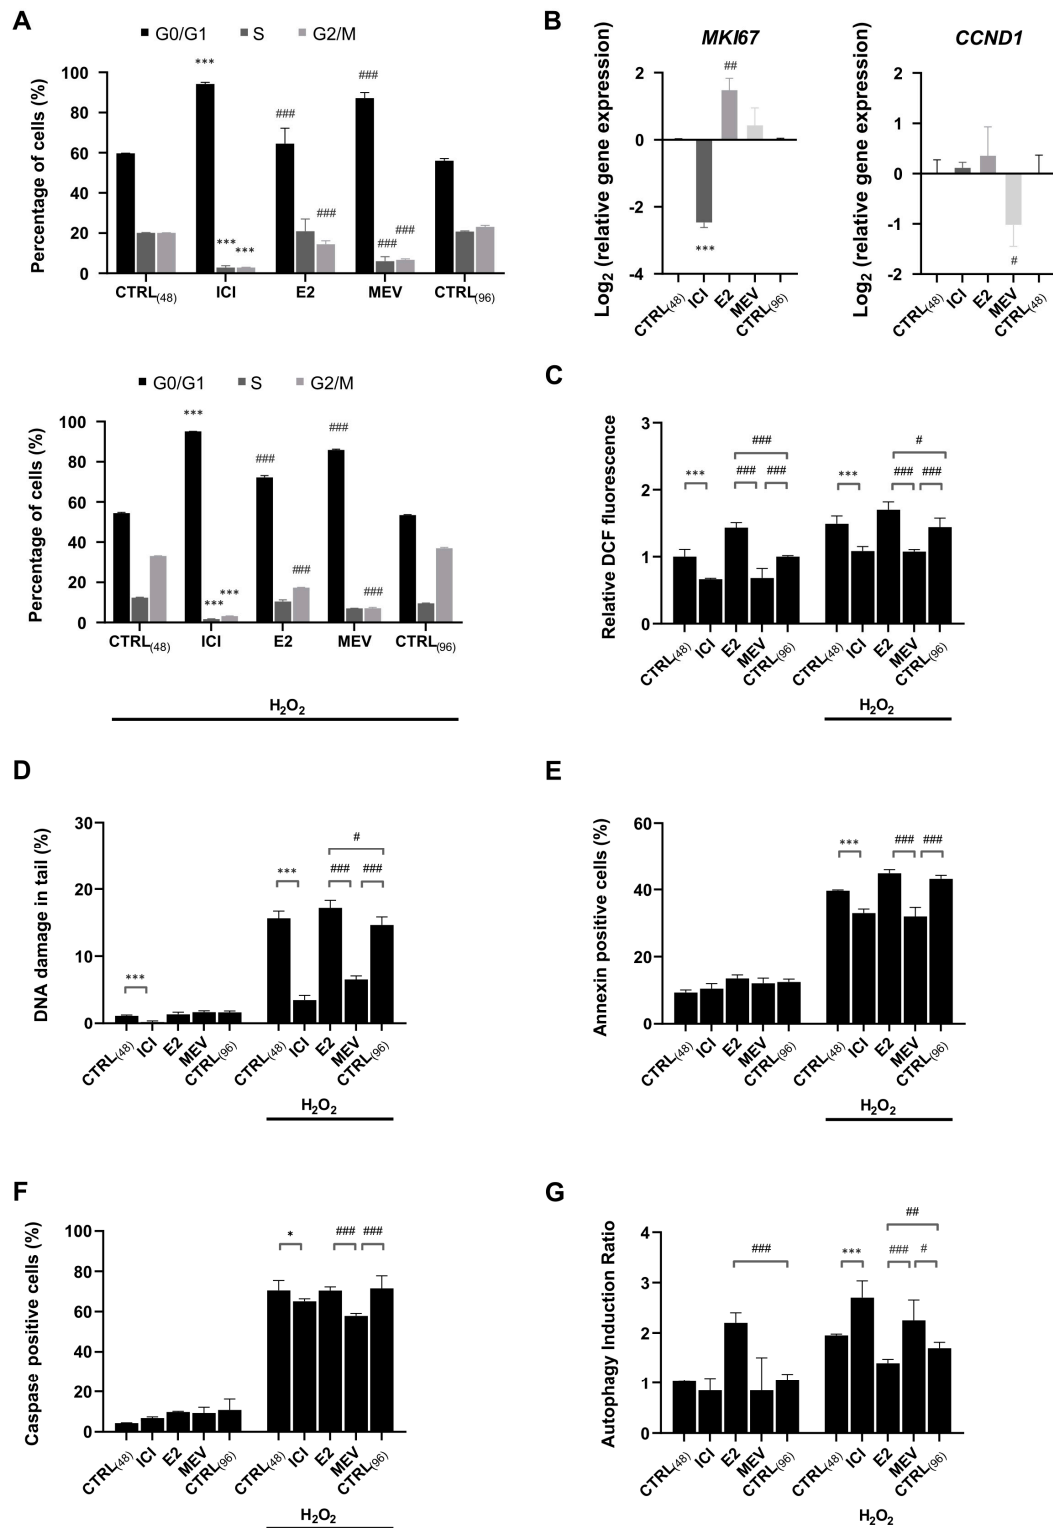

**Figure S2.** DNA damage response in the G0-like- (ICI), the cells that reinitiate cell cycle (E2) and the G1-arrested (MEV) MCF-7 cells exposed to hydrogen peroxide ( $H_2O_2$ ). (A) cell cycle modulation, (B) gene expression, (C) intracellular reactive oxygen species (ROS), (D) DNA damage, (E) apoptosis assayed as annexin V externalisation, (F) caspase activation, (G) autophagy assayed as the level of autophagosome-associated LC3-II. Negative controls for different exposure times: 48 h (CTRL<sub>(48)</sub>) for ICI treatment and 96 h (CTRL<sub>(96)</sub>) for E2 and MEV treatments are shown. Statistical comparisons were conducted to CTRL<sub>(48)</sub> (\*) for ICI treatment or to CTRL<sub>(96)</sub> (#) for E2 and MEV treatment.
